# Supplementary material for: Diverged Alleles of the Anopheles gambiae Leucine-Rich Repeat Gene APL1A Display Distinct Protective Profiles against Plasmodium falciparum
Source: PubMed Central journal article supplement (PMC3532451; doi:10.1371/journal.pone.0052684), 2012-12-28
Supplement: pone.0052684.s001.pdf [file pone.0052684.s001.pdf]

**Figure S1: Alignment of genomic regions coding for *APL1A*, *APL1B* and *APL1C* alleles in Ngousso mosquitoes**

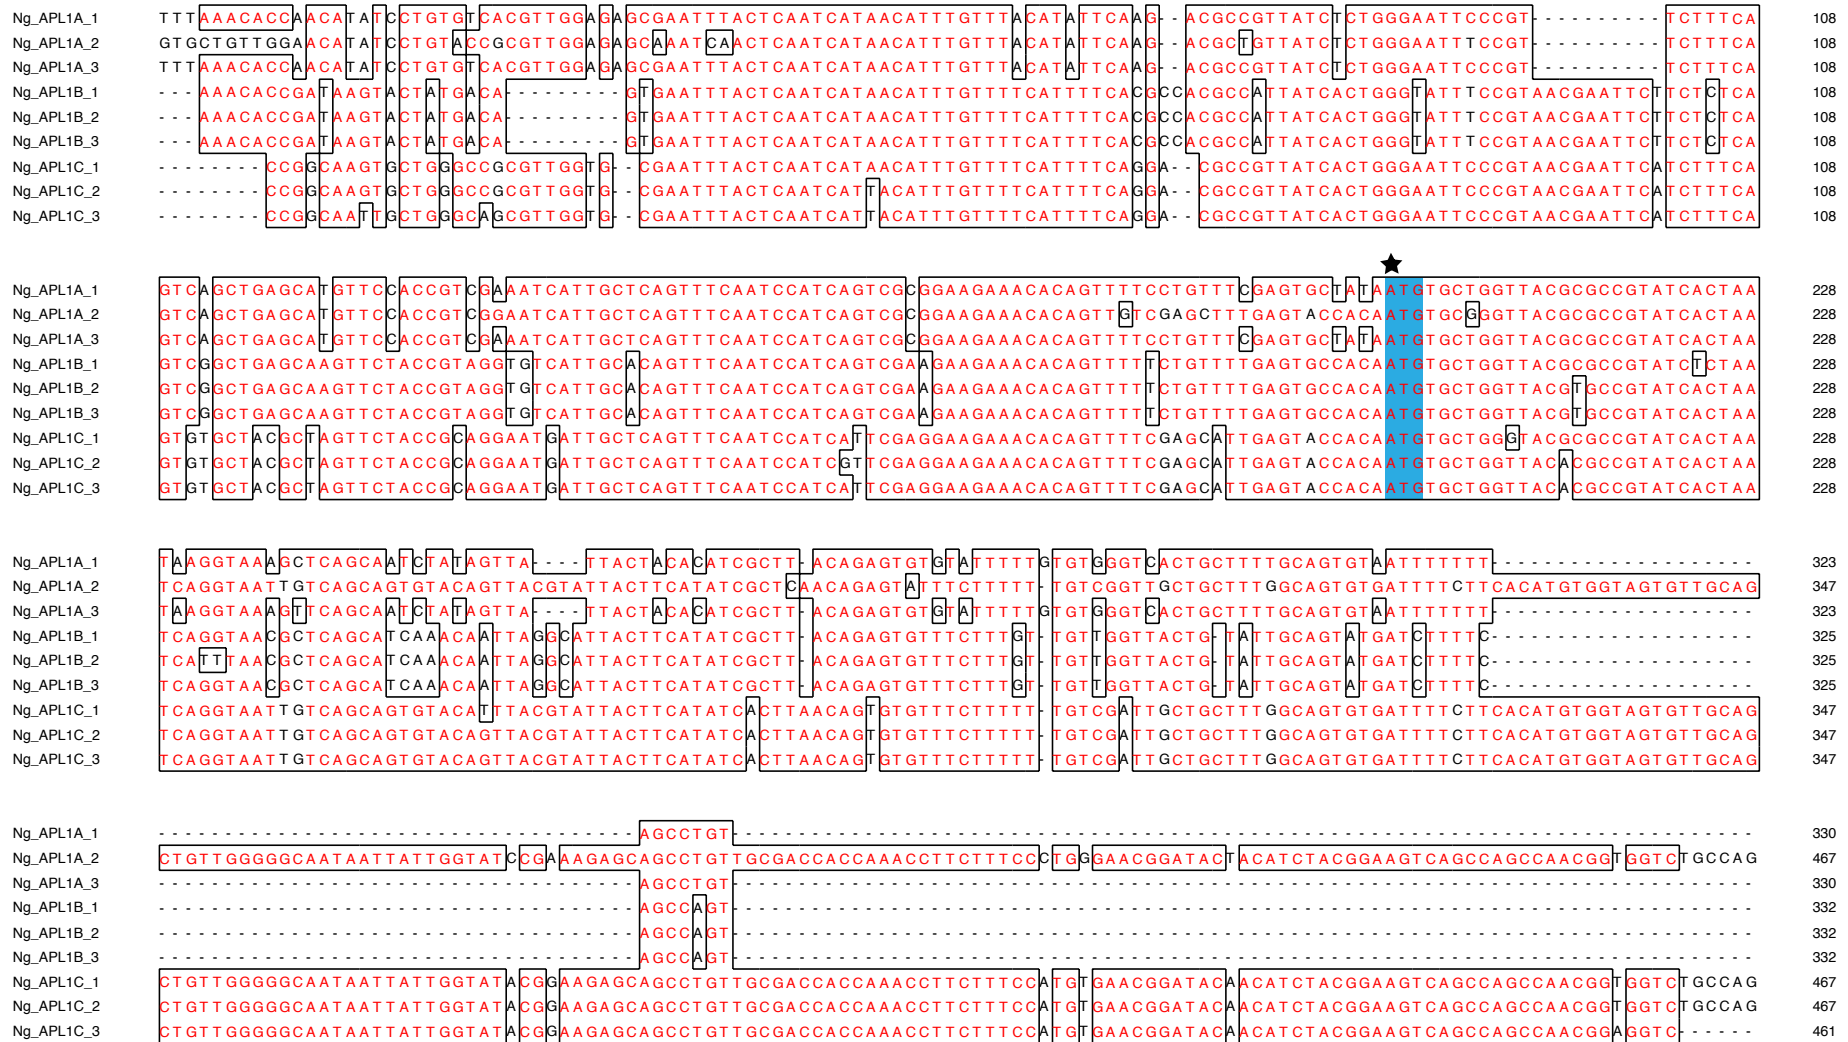

Ng\_APL1A\_1 ..... ACCA 334  
 Ng\_APL1A\_2 CCACAACCTACACACAAAGTCACA CAACCTACA CAAGA GAC CAAAACCTTCGGAGGT CAGT CAGCCAACGGAGGT T GCCG GCCAACGGAGGT CT TCC AGCCAACGGA GGA CT CCA GCCA 587  
 Ng\_APL1A\_3 ..... ACCA 334  
 Ng\_APL1B\_1 ..... ACCT 336  
 Ng\_APL1B\_2 ..... ACCT 336  
 Ng\_APL1B\_3 ..... ACCT 336  
 Ng\_APL1C\_1 CCACAACCTACACACAAAGTCACA CAACCTACA CAAGA GAC CAAAACCTTCGGAGGT CAGT CAGCCAACGGAGGT T GCCG GCCAACGGAGGT CT GCT AGCCAACGGA GGT CT CCA GCCA 587  
 Ng\_APL1C\_2 CCACAACCTACACACAAAGTCACA CAACCTACA CAAGA GAC CAAAACCTTCGGAGGT CAGT CAGCCAACGGAGGT T GCCG GCCAACGGAGGT CT TCC AGCCAACGGA GGA CT CCA GCCA 587  
 Ng\_APL1C\_3 ..... CAACCTACA GAAGT GAG CAAAACCTTCGGAGGT CAGT CAGCCAACGGAGGT T GCCG GCCAACGGAGGT CT TAC AGCCAACGGT GGT CT CCA GCCA 557

Ng\_APL1A\_1 ACGGAGGACTGCCATCCTACAGS AGT CAGC CAAAT TACGGAA AT ..... A A A D A C A C T A C T A C G A A G G T C A G C A A T C T A C A G A A G T C A G C C A A A T T A C G G A G G T C A G C A A C G C T A C A A C G C A A G A C C A C 424  
 Ng\_APL1A\_2 ACGGAGGTCTGCCAGCCAACAGAGGGCAGCTGCCGTATGGAACCTCCAACCCATATAGGTCA ACAATCTACAGAAGTCAGCCAAAT TACGGAGGT CAGCAACGCTACAACGC AAGACCAC 707  
 Ng\_APL1A\_3 ACGGAGGACTGCCATCCTACAGS AGT CAGC CAAAT TACGGAA AT ..... A A A C A A C G C T A C T A C G G A A A T C A G C A A T A C T A C A C G T A C A A C C A C 424  
 Ng\_APL1B\_1 ACGGAGGACAGCTATCCTACAAAAGTATGCAC ..... A A A C A A C G C T A C T A C G G A A A T C A G C A A T A C T A C A C G T A C A A C C A C 368  
 Ng\_APL1B\_2 ACGGAGGACAGCTATCCTACAAAAGTATGCAC ..... A A A C A A C G C T A C T A C G G A A A T C A G C A A T A C T A C A C G T A C A A C C A C 368  
 Ng\_APL1B\_3 ACGGAGGA T A C T A T C C T A C A A A G T A T G C A C ..... A A A C A A C G C T A C T A C G G A A A T C A G C A A T A C T A C A C G T A C A A C C A C 368  
 Ng\_APL1C\_1 ACGGAGGTCTGCCAGCCAACAGAGGGCAGCTGCCGTACGGAACTCCAACCCATATAGGTCA GACAATCTACAGAAGTCAGCCAAAT TACGGAGGT CAGCAACGCTACAACGC AAGACCAC 707  
 Ng\_APL1C\_2 ACGGAGGTCTGCCAGCCAACAGAGGGCAGCTGCCGTACGGAACTCCAACCCATATAGGTCA ACAATCTACAGAAGTCAGCCAAAT TACGGAGGT CAGCAACGCTA T A A C G T A A G A C C A C 707  
 Ng\_APL1C\_3 ACGGAGGTCT T C C A G C C A A C G S A G G G C A G C T G C C G T A C G G A A C T C C A A C C C A T A T A G G T C A G A C A A T C T A C A G A A G T C A G C C A A T T A C G G A G G T C A G C A A C G C T A C A A C C G T A A G A C C A C 677

Ng\_APL1A\_1 GACAGC C G A A T A C A A A T G C A T T G A G A S A A A T C T G C A G T A C G A C T G T G T G T T C T A C G A T G T G C A C A T T G A C A T G C A A A C G C A A G A C G T A T A C T T T G G C T T T G A G G A T A T A A C A C T A A A C A 544  
 Ng\_APL1A\_2 GACAGC T A S A A T A C A A A T G C A T T G A G G C T A A T C T G C A G T A C G A C T G T G T G T T C T A C A A T G T G C A C A T T G A C A T G C A A A C G C A A G A C G C A T A C T T T G G C T T T G A G A T T T A A C S C T A A A C A 827  
 Ng\_APL1A\_3 T A C A A C C G A A T A C A A A T G C A T T G A G A S A A A T C T G C A G T A C G A C T G T G T G T T C T A C A A T G T G C A C A T T G A C A T G C A A A C G C A A G A C G T A T A C T T T G G C T T T G A G G A T A T A A C A C T A A A C A 544  
 Ng\_APL1B\_1 ..... T T S A C T C C T T T C A C T T T G A G ..... 388  
 Ng\_APL1B\_2 ..... T T S A C T C C T T T C A C T T T G A G ..... 388  
 Ng\_APL1B\_3 ..... T T S A C T C C T T T C A C T T T G A G ..... 388  
 Ng\_APL1C\_1 GACAGC T A S A A T A C A A A T G C A T T G A G S S T A A T C T G C A G T A C G A C T G T G T G T T C T A C G A T G T G C A C A T T G A C A T G C A A A C G C A A G A C G T A T A C T T T G G C T T T G A G G A T A T A A C A C T A A A C A 827  
 Ng\_APL1C\_2 GACAGC C G A A T A C A A A T G C A T T G A G G S T A A T C T G C A G T A C G A C T G T G T G T T C T A C G A T G T G C A C A T T G A C A T G C A A A C G C A A G A C G T A T A C T T T G G C T T T G A G G A T A T A C A C T A A A C A 827  
 Ng\_APL1C\_3 GACAGC A C G A A T A C A A A T G C A T T G A G A S A A A T C T G C A G T A C G A C T G T G T G T T C T A C G A T G T G C A C A T T G A T A T G C A A T T C G C A A G A C G T A T A C T T T G G C T T T G A G G A T A T A A C A C T A A A C A 797

Ng\_APL1A\_1 ACCAGAAGAT T G T T A C C T T C A A A A A C T A C C A T G C G T A A A C T G C C G C T G C T T T A C T C G C C T C C T T C G C C A G G T T G A G S T G C T C A A T C T G A A C G A C C T G C A G A T A G A G C A G A T C G A T A 664  
 Ng\_APL1A\_2 ACCAGAAGAT T G T T A C C T T C A A A A A C T A C C A T G C G C A A A C T G C C G C T G C T T T A C T C G C C T C C T T C G C C A G G T T G A G S T G C T C A A T C T G A A T S G C C T G C A G A T A G A G G A G A T C G A T A 947  
 Ng\_APL1A\_3 ACCAGAAGAT T G T T A C C T T C A A A A A C T A C C A T G C G T A A A C T G C C G C T G C T T T A C T C G C C T C C T T C G C C A G G T T G A G C T G C T C A T C T G A A C G A C C T G C A G A T A G A G C A G A T C G A T A 664  
 Ng\_APL1B\_1 ..... T G C T T T A C T C G C C T C C T T C C A C A A G G T T G A G S T G C T C A A T C T G A A C G G C C T G C A G A T A G A G G A G A T C G A T A 459  
 Ng\_APL1B\_2 ..... T G C T T T A C T C G C C T C C T T C C A C A A G G T T G A A C T G C T C A A T C T G A A C G C C C T G C A G A T A G T S G A G A T C G A T A 459  
 Ng\_APL1B\_3 ..... T G C T T T A C T C G C C T C C T T C C A C A A G G T T G A A C T G C T C A A T C T G A A C G G C C T G C A G A T A G A G G A G A T C G A T A 459  
 Ng\_APL1C\_1 ACCAGAAGAT T G T T A C C T T C A A A A A C T A C C A T G C G C A A A C T G C C G C T G C T T T A C T C G C C T C C T T C G C C A G G T T G A G C T G C T C A A T C T G A A T S A C C T G C A G A T A G A G G A G A T C G A T A 947  
 Ng\_APL1C\_2 ACCAGAAGAT T G T T A C C T T C A A A A A C T A C C A T G C G C A A A C T G C C G C T G C T T T A C T C G C C T C C T T C G C C A G G T T G A G C T G C T C A A T C T G A A T S A C C T G C A G A T A G A G G A G A T C G A T A 947  
 Ng\_APL1C\_3 ACCAGAAGAT T G T T A C C T T C A A A A A C T A C C A T G C G C A A A C T G C C G C T G C T T T A C T C G C C T C C T A C G C C A G G T T G A G C T G C T C A T C T G A A C T G A A C T G A A C G A C C T G C A G A T A G A G C A G A T C G A T A 917

Ng\_APL1A\_1 CGAACGCGTTTCGCTTACGCGCACACAATT CAGAAGCTGTACATGGGATTCAATGCGATTGATATTTGCCACCGTACGTGTTTCAGAACGTCCCATCGCTCACGGTGCTTGTGCTGGAAC 784  
Ng\_APL1A\_2 CGAACGCGTTTCGCTTACGCGCACACAATACAGAAGCTGT ----- 986  
Ng\_APL1A\_3 CGAACGCGTTTCGCTTACGCGCACACAATT CAGAAGCTGTACATGGGATTCAATGCGATTGATATTTGCCACCGTACGTGTTTCAGAACGTCCCATCGCTCACGGTGCTTGTGCTGGAAC 784  
Ng\_APL1B\_1 CGAACGCGTTTCGCTTACGCGCACACAATACAGAAGCTGTACATGAGATTCAATGAGATTAGATATTTGCCACCGTACGTGTTTCAGAACGTCCCATCGCTCACGGTGCTTGTGCTGGAAC 579  
Ng\_APL1B\_2 CGAACGCGTTTCGCTTACGCGCACACAATACAGAAGCTGTACATGAGATTCAATGAGATTAGATATTTGCCACCGTACGTGTTTCAGAACGTCCCATCGCTCACGGTGCTTGTGCTGGAAC 579  
Ng\_APL1B\_3 CGAACGCGTTTCGCTTACGCGCACACAATACAGAAGCTGTACATGAGATTCAATGAGATTAGATATTTGCCACCGTACGTGTTTCAGAACGTCCCATCGCTCACGGTGCTTGTGCTGGAAC 579  
Ng\_APL1C\_1 CGAACGCGTTTCGCTTACGCGCACACAATT CAGAAGCTGTACATGGGATTCAATGCGATTGATATTTGCCACCGTACGTGTTTCAGAACGTCCCATCGCTCACGGTGCTTGTGCTGGAAC 1067  
Ng\_APL1C\_2 CGAACGCGTTTCGCTTACGCGCACACAATT CAGAAGCTGTACATGGGATTCAATGCGATTGATATTTGCCACCGTACGTGTTTCAGAACGTCCCATCGCTCACGGTGCTTGTGCTGGAAC 1067  
Ng\_APL1C\_3 CGAACGCGTTTCGCTTACGCGCACACAATACAGAAGCTGTACATGGGATTCAATGCGATTGATATTTGCCACCGTACGTGTTTCAGAACGTCCCATCGCTCACGGTGCTTGTGCTGGAAC 1037

Ng\_APL1A\_1 GGAACGATTTAACCGAGCCTGCCACGCGGAATCTTCCACAACACACCCAAAGCTCAGCATGCTGTCGATGTCAAACAACAACCTGGAGCGCATCGAAGACGAACTTTCCAAGCACTACA 904  
Ng\_APL1A\_2 GGAACGATTTAACCGAGCCTGCCACGCGGAATCTTCCACAACACACCCAAAGCTCAGCATGCTGTCGATGTCAAACAACAACCTGGAGCGCATCGAAGACGAACTTTCCAAGCACTACA 1043  
Ng\_APL1A\_3 GGAACGATTTAACCGAGCCTGCCACGCGGAATCTTCCACAACACACCCAAAGCTCAGCATGCTGTCGATGTCAAACAACAACCTGGAGCGCATCGAAGACGAACTTTCCAAGCACTACA 904  
Ng\_APL1B\_1 GGAACGATTTAACCGAGCCTGCCACGCGGAATCTTCCACAACACACCCAAAGCTCAGCATGCTGTCGATGTCAAACAACAACCTGGAGCGCATCGAAGACGAACTTTCCAAGCACTACA 699  
Ng\_APL1B\_2 GGAACGATTTAACCGAGCCTGCCACGCGGAATCTTCCACAACACACCCAAAGCTCAGCATGCTGTCGATGTCAAACAACAACCTGGAGCGCATCGAAGACGAACTTTCCAAGCACTACA 699  
Ng\_APL1B\_3 GGAACGATTTAACCGAGCCTGCCACGCGGAATCTTCCACAACACACCCAAAGCTCAGCATGCTGTCGATGTCAAACAACAACCTGGAGCGCATCGAAGACGAACTTTCCAAGCACTACA 699  
Ng\_APL1C\_1 GGAACGATTTAACCGAGCCTGCCACGCGGAATCTTCCACAACACACCCAAAGCTCAGCATGCTGTCGATGTCAAACAACAACCTGGAGCGCATCGAAGACGAACTTTCCAAGCACTACA 1187  
Ng\_APL1C\_2 GGAACGATTTAACCGAGCCTGCCACGCGGAATCTTCCACAACACACCCAAAGCTCAGCATGCTGTCGATGTCAAACAACAACCTGGAGCGCATCGAAGACGAACTTTCCAAGCACTACA 1187  
Ng\_APL1C\_3 GGAACGATTTAACCGAGCCTGCCACGCGGAATCTTCCACAACACACCCAAAGCTCAGCATGCTGTCGATGTCAAACAACAACCTGGAGCGCATCGAAGACGAACTTTCCAAGCACTACA 1157

Ng\_APL1A\_1 CGCTTCAAATCTTCAACTGTCCAGCAACAGGCTTACGCATGTTGACCTTCTCTCATTCCAGTCTCTTCCAGTCAACGTGCTTCAAACCTGCTCTCAACGCTTGCCATACCGATCG 1024  
Ng\_APL1A\_2 CGCTTCAAATCTTCAACTGTCCAGCAACAGGCTTACGCATGTTGACCTTCTCTCATTCCAGTCTCTTCCAGTCAACGTGCTTCAAACCTGCTCTCAACGCTTGCCATACCGATCG 1163  
Ng\_APL1A\_3 CGCTTCAAATCTTCAACTGTCCAGCAACAGGCTTACGCATGTTGACCTTCTCTCATTCCAGTCTCTTCCAGTCAACGTGCTTCAAACCTGCTCTCAACGCTTGCCATACCGATCG 1024  
Ng\_APL1B\_1 CGCTTCAAATCTTCAACTGTCCAGCAACAGGCTTACGCATGTTGACCTTCTCTCATTCCAGTCTCTTCCAGTCAACGTGCTTCAAACCTGCTCTCAACGCTTGCCATACCGATCG 819  
Ng\_APL1B\_2 CGCTTCAAATCTTCAACTGTCCAGCAACAGGCTTACGCATGTTGACCTTCTCTCATTCCAGTCTCTTCCAGTCAACGTGCTTCAAACCTGCTCTCAACGCTTGCCATACCGATCG 819  
Ng\_APL1B\_3 CGCTTCAAATCTTCAACTGTCCAGCAACAGGCTTACGCATGTTGACCTTCTCTCATTCCAGTCTCTTCCAGTCAACGTGCTTCAAACCTGCTCTCAACGCTTGCCATACCGATCG 819  
Ng\_APL1C\_1 CGCTTCAAATCTTCAACTGTCCAGCAACAGGCTTACGCATGTTGACCTTCTCTCATTCCAGTCTCTTCCAGTCAACGTGCTTCAAACCTGCTCTCAACGCTTGCCATACCGATCG 1307  
Ng\_APL1C\_2 ACGCTTCAAATCTTCAACTGTCCAGCAACAGGCTTACGCATGTTGACCTTCTCTCATTCCAGTCTCTTCCAGTCAACGTGCTTCAAACCTGCTCTCAACGCTTGCCATACCGATCG 1307  
Ng\_APL1C\_3 CGCTTCAAATCTTCAACTGTCCAGCAACAGGCTTACGCATGTTGACCTTCTCTCATTCCAGTCTCTTCCAGTCAACGTGCTTCAAACCTGCTCTCAACGCTTGCCATACCGATCG 1277

Ng\_APL1A\_1 CGGTGGAAGAGCTAGAGCGCATCGCACAAATAGCATCAACGCCGTACGCGGGCCCGTCAACATGGAGTTGACCATTCTGAAGCTGCAACACAACTTACTGACTGACTGCCTGGCTGCTGA 1144  
Ng\_APL1A\_2 CGGTGGAAGAGCTAGAGCGCATCGCACAAATAGCATCAACGCCGTACGCGGGCCCGTCAACATGGAGTTGACCATTCTGAAGCTGCAACACAACTTACTGACTGACTGCCTGGCTGCTGA 1283  
Ng\_APL1A\_3 CGGTGGAAGAGCTAGAGCGCATCGCACAAATAGCATCAACGCCGTACGCGGGCCCGTCAACATGGAGTTGACCATTCTGAAGCTGCAACACAACTTACTGACTGACTGCCTGGCTGCTGA 1144  
Ng\_APL1B\_1 CAGTTCGAAGAAGCTAGAGCGCATCGCACAAATAGCATCAACGCCGTACGCGGGCCCGTCAACATGGAGTTGACCATTCTGAAGCTGCAACACAACTTACTGACTGACTGCCTGGCTGCTGA 939  
Ng\_APL1B\_2 CAGTTCGAAGAAGCTAGAGCGCATCGCACAAATAGCATCAACGCCGTACGCGGGCCCGTCAACATGGAGTTGACCATTCTGAAGCTGCAACACAACTTACTGACTGACTGCCTGGCTGCTGA 939  
Ng\_APL1B\_3 CAGTTCGAAGAAGCTAGAGCGCATCGCACAAATAGCATCAACGCCGTACGCGGGCCCGTCAACATGGAGTTGACCATTCTGAAGCTGCAACACAACTTACTGACTGACTGCCTGGCTGCTGA 939  
Ng\_APL1C\_1 CGGTGGAAGAGCTAGAGCGCATCGCACAAATAGCATCAACGCCGTACGCGGGCCCGTCAACATGGAGTTGACCATTCTGAAGCTGCAACACAACTTACTGACTGACTGCCTGGCTGCTGA 1427  
Ng\_APL1C\_2 CGGTGGAAGAAGCTAGAGCGCATCGCACAAATAGCATCAACGCCGTACGCGGGCCCGTCAACATGGAGTTGACCATTCTGAAGCTGCAACACAACTTACTGACTGACTGCCTGGCTGCTGA 1427  
Ng\_APL1C\_3 CGGTGGAAGAGCTAGAGCGCATCGCACAAATAGCATCAACGCCGTACGCGGGCCCGTCAACATGGAGTTGACCATTCTGAAGCTGCAACACAACTTACTGACTGACTGCCTGGCTGCTGA 1397

|            |                                                       |      |
|------------|-------------------------------------------------------|------|
| Ng_APL1A_1 | ATTATCCCGGACTGGTTGAGGTGGATCTTTCTACAACGAGTTGGAGAAGATAA | 1264 |
| Ng_APL1A_2 | ACTATCCCA                                             | 1403 |
| Ng_APL1A_3 | ATTATCCCGGACTGGTTGAGGTGGATCTTTCTACAACGAGTTGGAGAAGATAA | 1264 |
| Ng_APL1B_1 | ACTATCC                                               | 1059 |
| Ng_APL1B_2 | ATTATCC                                               | 1059 |
| Ng_APL1B_3 | ACTATCC                                               | 1059 |
| Ng_APL1C_1 | ACTATCCCGGACTGGTTGACGTGGATCTTTCTACAACGAGTTGGAGAAGATAA | 1547 |
| Ng_APL1C_2 | ACTATCCCGGACTGGTTGACGTGGATCTTTCTACAACGAGTTGGAGAAGATAA | 1547 |
| Ng_APL1C_3 | ATTATCCCGGACTGGTTGAGGTGGATCT                          | 1517 |

|            |                     |      |
|------------|---------------------|------|
| Ng_APL1A_1 | CGCTCAATCTTTACGGTCA | 1384 |
| Ng_APL1A_2 | CGCTCGA             | 1523 |
| Ng_APL1A_3 | CGCTCGA             | 1384 |
| Ng_APL1B_1 | CGCTCGA             | 1179 |
| Ng_APL1B_2 | CGCTCGA             | 1179 |
| Ng_APL1B_3 | CGCTCGA             | 1179 |
| Ng_APL1C_1 | CGCTCAATCTTTACGGTCA | 1667 |
| Ng_APL1C_2 | CGCTCAATCTTTACGGTCA | 1667 |
| Ng_APL1C_3 | CGCTCAATCTTTACGGTCA | 1637 |

|            |                                         |      |
|------------|-----------------------------------------|------|
| Ng_APL1A_1 | ACCACAACCTCCATCGTGACGCTTAAGCTTAGCACCAGT | 1504 |
| Ng_APL1A_2 | ACCACAACCT                              | 1643 |
| Ng_APL1A_3 | ACCACAACCT                              | 1504 |
| Ng_APL1B_1 | ACCACAACCT                              | 1299 |
| Ng_APL1B_2 | ACCACAACCT                              | 1299 |
| Ng_APL1B_3 | ACCACAACCT                              | 1299 |
| Ng_APL1C_1 | ACCACAACCT                              | 1787 |
| Ng_APL1C_2 | ACCACAACCT                              | 1787 |
| Ng_APL1C_3 | ACCACAACCT                              | 1757 |

|            |         |      |
|------------|---------|------|
| Ng_APL1A_1 | CTGTG   | 1624 |
| Ng_APL1A_2 | CTGCAGT | 1763 |
| Ng_APL1A_3 | CTGTG   | 1616 |
| Ng_APL1B_1 | CTGTG   | 1419 |
| Ng_APL1B_2 | CTGCAGT | 1419 |
| Ng_APL1B_3 | CTGCAGT | 1419 |
| Ng_APL1C_1 | CTGCAGT | 1907 |
| Ng_APL1C_2 | CTGCAGT | 1907 |
| Ng_APL1C_3 | CTGCAGT | 1877 |

|            |                         |                          |                                        |                                                       |      |
|------------|-------------------------|--------------------------|----------------------------------------|-------------------------------------------------------|------|
| Ng_APL1A_1 | GCGTGGCGGA              | AAGTTGCAGCGTGCACAA       | GGACGCTGCAGTGCCACAGATGCCATCAACAGCGTGCA | AAGTCTGTCCCACTACATCACACAGCAGGGTGATGTGCCACTGCAGGGTAACG | 1744 |
| Ng_APL1A_2 | GCGTGGTGGAGAA           | TTGTCGTCACAGGGACGCTGCAGT | GAACACAGATGCCATCAACAGCGTGCA            | TAGTCTGTCCCACTACATCACACAGCA                           | 1883 |
| Ng_APL1A_3 | GCGTGGCGGAGAAGTTGCAGCGT | AACAGGGACGCTGCAGT        | ACCGCAGATGCCATCAACAGCGT                | GCAAGTCTGTACCACTCATCACACAGCAGGGTGTGTGGA               | 1736 |
| Ng_APL1B_1 | GCGTGGT                 | TGAGAA                   | ACAGCGTA                               | AAATGAAACCGTGCAGTGCCACAGATGCCATCAACAGCGT              | 1536 |
| Ng_APL1B_2 | GCGTGGCGGA              | AAGTTGCAGCGT             | AACAGGAAACGCTGCAGT                     | ACCGCAGATGCCATCAACAGCGT                               | 1539 |
| Ng_APL1B_3 | GCGTGGCGGAGAAGTTGCAGCGT | AACAGGAAACGCTGCAGT       | ACCGCAGATGCCATCAACAGCGT                | GCAAGTCTGTACCACTCATCA                                 | 1539 |
| Ng_APL1C_1 | GCGTGGTGGAGAA           | TTGCAGCGTGCACAA          | GGACGCTGCAGTGCCACAGAT                  | CCATCAACAGCGTGCA                                      | 2027 |
| Ng_APL1C_2 | GCGTGGCGGA              | AAGTTGCAGCGTGCACAA       | GGACGCTGCAGTGCCACAGAT                  | GCCATCAACAGCGTGCA                                     | 2027 |
| Ng_APL1C_3 | GCGTGGTGGAGAA           | TTGCAGCGTGCACAA          | GGACGCTGCAGTGCCACAGAT                  | CCATCAACAGCGTGCA                                      | 1997 |

|            |                                      |                                |                                |                    |                          |         |            |       |     |                       |      |
|------------|--------------------------------------|--------------------------------|--------------------------------|--------------------|--------------------------|---------|------------|-------|-----|-----------------------|------|
| Ng_APL1A_1 | AAACAGCTCGAGGCCGAAGTCAACGAGCTGAGGGCT | GCGTGCAGCAGTAACCA              | TGAGCAGAT                      | CAACAGC            | AGCAGCTCCT               | AGCAA   | GA         | CT    | GCA | AGCCGAGATCGATACCAATCT | 1864 |
| Ng_APL1A_2 | AAACAGCTCGAGGCCGAAGT                 | AAACGAGCTGAGGGCTGAGGTGCAGCAGCT | TACCAACGAGCA                   | TATAC              | ACAGGAGCAGCTCCT          | GGAA    | GA         | CT    | GCA | AGCCGAGATCGATACCAATCT | 2003 |
| Ng_APL1A_3 | TACAGCTCGAGGCC                       | TGAAGT                         | AAACGAGCTGAGGGCT               | GCGTGCAGCAGCTAACCA | TGAGCAGAT                | CAACAGC | AGCAGCTCCT | AGCAA | GA  | CT                    | 1856 |
| Ng_APL1B_1 | AAACAGCTCGAGGCCGAAGTCAACGAGCTGAGGGCT | GAGGTGCAGCAGCTAACCA            | ACGAGCAGATACAACAGGAGCAGCT      | CCTGCAGGGGCT       | ACAGCCGAGATCGATACCAATCT  | 1656    |            |       |     |                       |      |
| Ng_APL1B_2 | AAACAGCTCGAGGCCGAAGTCAACGAGCTGAGGGCT | GAGGTGCAGCAGCTAACCA            | ACGAGCAGATACAACAGGAGCAGCT      | GCTGCAGGGGCT       | ACAGCCGAGATCGATACCAATCT  | 1659    |            |       |     |                       |      |
| Ng_APL1B_3 | AAACAGCTCGAGGCCGAAGTCAACGAGCTGAGGGCT | GAGGTGCAGCAGCTAACCA            | ACGAGCAGATACAACAGGAGCAGCT      | GCTGCAGGGGCT       | ACAGCCGAGATCGATACCAATCT  | 1659    |            |       |     |                       |      |
| Ng_APL1C_1 | AAACAGCTCGAGGCCGAAGTCAACGAGCTGAGGGCT | GAGGTGCAGCAGCTAACCA            | ACGAGCAGATACAACAGGAGCAGCT      | GCTGCAGGGGCT       | ACAGCCGAGATCGATACCAATCT  | 2147    |            |       |     |                       |      |
| Ng_APL1C_2 | AAACAGCTCGAGGCCGAAGTCAACGAGCTGAGGGCT | GAGGTGCAGCAGCT                 | TACCAACGAGCAGATACAACAGGAGCAGCT | GCTGCAGGGGCT       | ACAGCCGAGAT              | 2147    |            |       |     |                       |      |
| Ng_APL1C_3 | AAACAGCTCGAGGCCGAAGT                 | AAACGAGCTGAGGGCTGAGGTGCAGCAGCT | TACCAACGAGCAGATACAACAGGAGCAGCT | GCTGCAGGGGCT       | TACAGCCGAGATCGATACCAATCT | 2117    |            |       |     |                       |      |

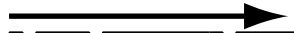

|            |         |           |            |                |                           |                         |           |                |                                    |                                    |        |      |           |         |        |     |      |     |      |     |      |     |      |     |      |
|------------|---------|-----------|------------|----------------|---------------------------|-------------------------|-----------|----------------|------------------------------------|------------------------------------|--------|------|-----------|---------|--------|-----|------|-----|------|-----|------|-----|------|-----|------|
| Ng_APL1A_1 | GCTACCA | CCTGCCGAA | AGATGAGT   | FAGCACGCCCGAGT | GATAGTCT                  | TAA                     | CAAA      | CT             | ATTACCCCA                          | CTGAAGGA                           | ACGC   | CA   | TTT       | GCAT    | GAGTTG | GT  | AAAT | CA  | CT   | AGT | ACT  | CAT | GAAA | AGG | 1984 |
| Ng_APL1A_2 | GCTACCA | CCTGCCGAA | AGATGAGT   | FAGCACGCCCGAGT | GATAGTCT                  | TAA                     | CAAA      | CA             | TTT                                | GCAT                               | GAGTTG | GT   | AAAT      | CA      | CT     | AGT | ACT  | CAT | GAAA | AGG | 2123 |     |      |     |      |
| Ng_APL1A_3 | GCTACCA | CCTGCCGAA | AGATGAGT   | FAGCACGCCCGAGT | GATAGTCT                  | TAA                     | CAAA      | CT             | ATTACCCCA                          | CTGAAGGA                           | ACGC   | CA   | TTT       | GCAT    | GAGTTG | GT  | AAAT | CA  | CT   | AGT | ACT  | CAT | GAAA | AGG | 1976 |
| Ng_APL1B_1 | GGT     | CCGCCT    | GC         | CAAGGAT        | GAACTAGCGCGCCGAGCGA       | AAATCTAAATAAAGTGTT      | TACCCATCT | CA             | AGGAGCGGCACGCGTTT                  | AAAGTTGCGT                         | GAAACT | CA   | GGCACGCGT | ACGGAGG | 1776   |     |      |     |      |     |      |     |      |     |      |
| Ng_APL1B_2 | GGT     | ACCGCCT   | GC         | CAAGGAT        | GAACTAGCGCGCCGAGCGA       | AAATCTAAATAAAGTGTT      | TACCCATCT | CA             | AGGAGCGGCACGCGTTT                  | AAAGTTGCGCGAAACGCAGGCACGCGCACGGAA  | AG     | 1779 |           |         |        |     |      |     |      |     |      |     |      |     |      |
| Ng_APL1B_3 | GGT     | ACCGCCT   | GC         | CAAGGAT        | GAACTAGCGCGCCGAGCGA       | AAATCTAAATAAAGTGTT      | TACCCATCT | CA             | AGGAGCGGCACGCGTTT                  | AAAGTTGCGCGAAACGCAGGCACGCGCACGGAA  | AG     | 1779 |           |         |        |     |      |     |      |     |      |     |      |     |      |
| Ng_APL1C_1 | GGT     | ACCGCCT   | GCCGAAGGAT | GAACTAGCGCGCT  | CGAGCGATAATCTAAATAAAGTGTT | CACCCATCT               | GAA       | AGCGGCACGCGTTT | AAAGTTGCGCGAAACGCAGGCACGCGCACGGAGG | 2267                               |        |      |           |         |        |     |      |     |      |     |      |     |      |     |      |
| Ng_APL1C_2 | GGT     | CCGCCT    | GCC        | CAAGGAT        | GAACTAGCACGCC             | AGCGATAATCTAAATAAAGTGTT | CACCCATCT | GAA            | AGCGGCACGCGTTT                     | AAAGTTGCGCGAAACGCAGGCACGCGCACGGAGG | 2267   |      |           |         |        |     |      |     |      |     |      |     |      |     |      |
| Ng_APL1C_3 | GGT     | ACCGCCT   | GCCGAAGGAT | GAACTAGCGCGCT  | CGAGCGATAATCTAAATAAAGTGTT | CACCCATCT               | GAA       | AGCGGCACGCGTTT | AAAGTTGCGCGAAACGCAGGCACGCGCACGGAGG | 2237                               |        |      |           |         |        |     |      |     |      |     |      |     |      |     |      |

|            |       |        |         |       |         |      |           |       |              |      |     |       |     |     |    |       |       |      |       |     |      |    |       |    |      |     |     |    |        |       |       |       |       |      |       |      |
|------------|-------|--------|---------|-------|---------|------|-----------|-------|--------------|------|-----|-------|-----|-----|----|-------|-------|------|-------|-----|------|----|-------|----|------|-----|-----|----|--------|-------|-------|-------|-------|------|-------|------|
| Ng_APL1A_1 | CT    | GATGAT | AAGCT   | CAAGG | ACCAGAT | GGAT | GT        | TAT   | TGGAACA      | AAAT | TAT | TAGAT | CTC | CGT | TT | GGAA  | CGGAT | AGCT | AACTT | AGG | -    | -  | AAGCA | AT | TGCA | TT  | GAG | G  | CAGGA  | -     | -     | -     | -     | -    | GAAGC | 2092 |
| Ng_APL1A_2 | CT    | TATGAT | AAGCT   | CAAGG | ACCAGAT | GGAT | GT        | TAT   | TGGAACA      | AAAT | TAT | TAGAT | CTC | CGT | TT | GGAA  | CGGAT | AGCT | AACTT | AGG | -    | -  | AAGCA | AT | TGCA | TT  | GAG | G  | CAGGA  | T     | ACGAT | GCT   | GAAGC | 2240 |       |      |
| Ng_APL1A_3 | CT    | GATGAT | AAGCT   | CAAGG | ACCAGAT | GGAT | GT        | TAT   | TGGAACA      | AAAT | TAT | TAGAT | CTC | CGT | TT | GGAA  | CGGAT | AGCT | AACTT | AGG | -    | -  | AAGCA | AT | TGCA | TT  | GAG | G  | CAGGAG | ACGCT | GAAGC | 2093  |       |      |       |      |
| Ng_APL1B_1 | CGGAT | GCT    | AAGCAGA | AGG   | -       | -    | AAACGGAG  | CACCT | GGAACAGGAAAA | CATT | GC  | ACT   | T   | GAG | CG | CAGTT | GGATA | AATA | AAGAA | T   | CAAT | GC | GAT   | CT | GTT  | GAG | CAG | CT | GAC    | GT    | GCT   | GAAGC | 1893  |      |       |      |
| Ng_APL1B_2 | CGGAT | GCT    | AAGCAGA | AGG   | -       | -    | AAACGGAGG | ACCT  | GGAACAGGAAAA | CATT | GC  | ACT   | T   | GAG | CG | CAGTT | GGATA | AATA | AAGAA | T   | CAAT | GC | GAT   | CT | GTT  | GAG | CAG | CT | GAC    | GT    | GCT   | GAAGC | 1896  |      |       |      |
| Ng_APL1B_3 | CGGAT | GCT    | AAGCAGA | AGG   | -       | -    | AAACGGAGG | ACCT  | GGAACAGGAAAA | CATT | GC  | ACT   | T   | GAG | CG | CAGTT | GGATA | AATA | AAGAA | T   | CAAT | GC | GAT   | CT | GTT  | GAG | CAG | CT | GAC    | GT    | GCT   | GAAGC | 1896  |      |       |      |
| Ng_APL1C_1 | CGGAT | GCT    | AAGCAGA | AGG   | -       | -    | AAACGGAGG | ACCT  | GGAACAGGAAAA | CATT | GC  | GCT   | T   | GAG | CG | CAGTT | GGATA | AATA | AAGAA | T   | CAAT | GC | GAT   | CT | GTT  | GAG | CAG | CT | GAC    | GT    | GCT   | GAAGC | 2384  |      |       |      |
| Ng_APL1C_2 | CGGAT | GCT    | AAGCAGA | AGG   | -       | -    | AAACGGAGG | ACCT  | GGAACAGGAAAA | CATT | GC  | GCT   | T   | GAG | CG | CAGTT | GGATA | AATA | AAGAA | T   | CAAT | GC | GAT   | CT | GTT  | GAG | CAG | CT | GAC    | GT    | GCT   | GAAGC | 2384  |      |       |      |
| Ng_APL1C_3 | CGGAT | GCT    | AAGCAGA | AGG   | -       | -    | AAACGGAGG | ACCT  | GGAACAGGAAAA | CATT | GC  | GCT   | T   | GAG | CG | CAGTT | GGATA | AATA | AAGAA | T   | CAAT | GC | GAT   | CT | GTT  | GAG | CAG | CT | GAC    | GT    | GCT   | GAAGC | 2354  |      |       |      |
