# Supplementary material for: Diverged Alleles of the Anopheles gambiae Leucine-Rich Repeat Gene APL1A Display Distinct Protective Profiles against Plasmodium falciparum
Source: PubMed Central journal article supplement (PMC3532451; doi:10.1371/journal.pone.0052684), 2012-12-28

**Figure S4A: Observed *APL1A* allele frequencies**

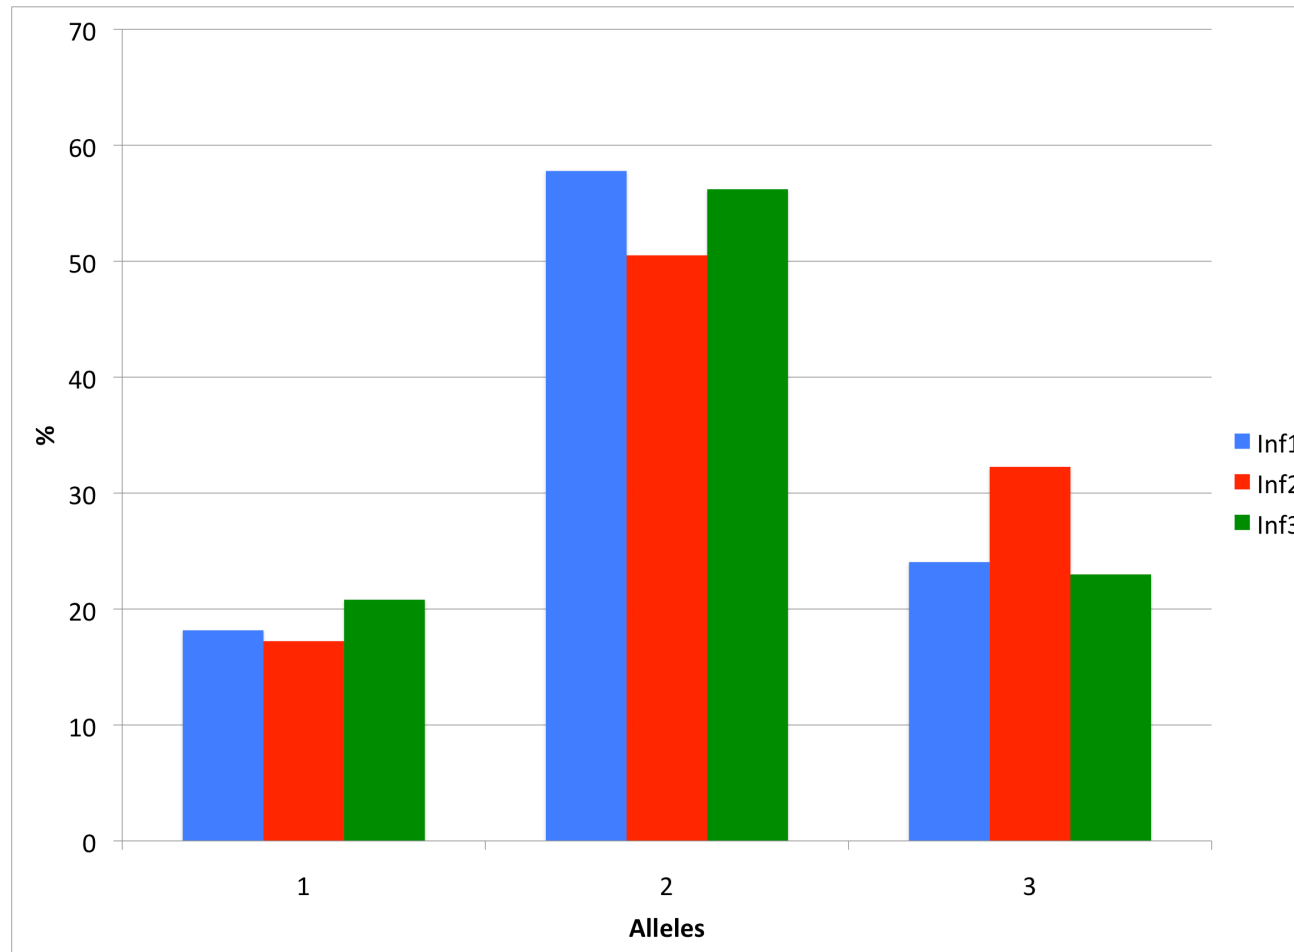

**Figure S4B: Observed *APL1A* genotype frequencies**

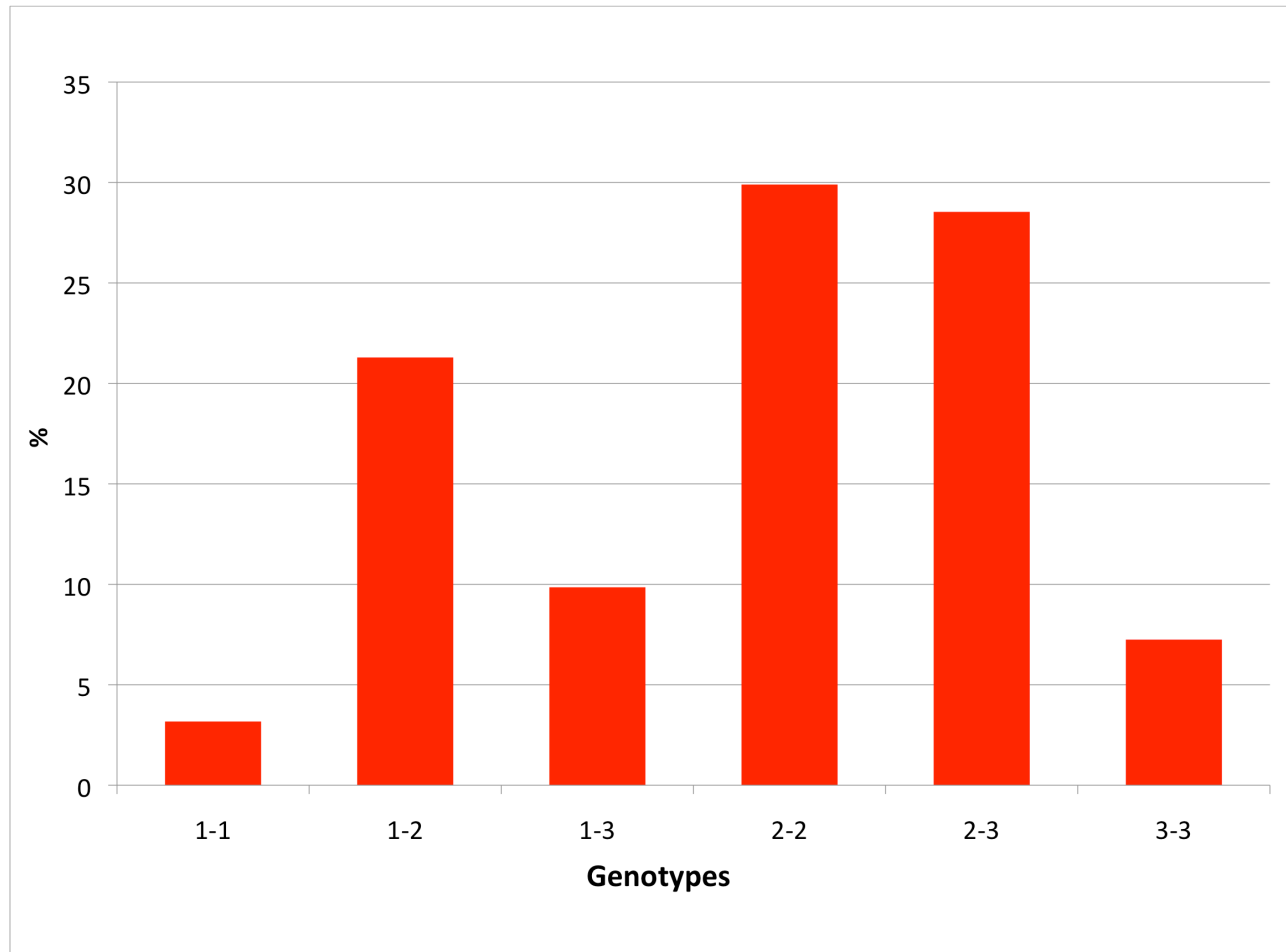

Supplement: pone.0052684.s004.pdf [file pone.0052684.s004.pdf]
