# Supplementary material for: Diverged Alleles of the Anopheles gambiae Leucine-Rich Repeat Gene APL1A Display Distinct Protective Profiles against Plasmodium falciparum
Source: PubMed Central journal article supplement (PMC3532451; doi:10.1371/journal.pone.0052684), 2012-12-28
Supplement: pone.0052684.s005.pdf [file pone.0052684.s005.pdf]

Figure S5A: Polydot plot of *APL1* alleles

wordsize=8

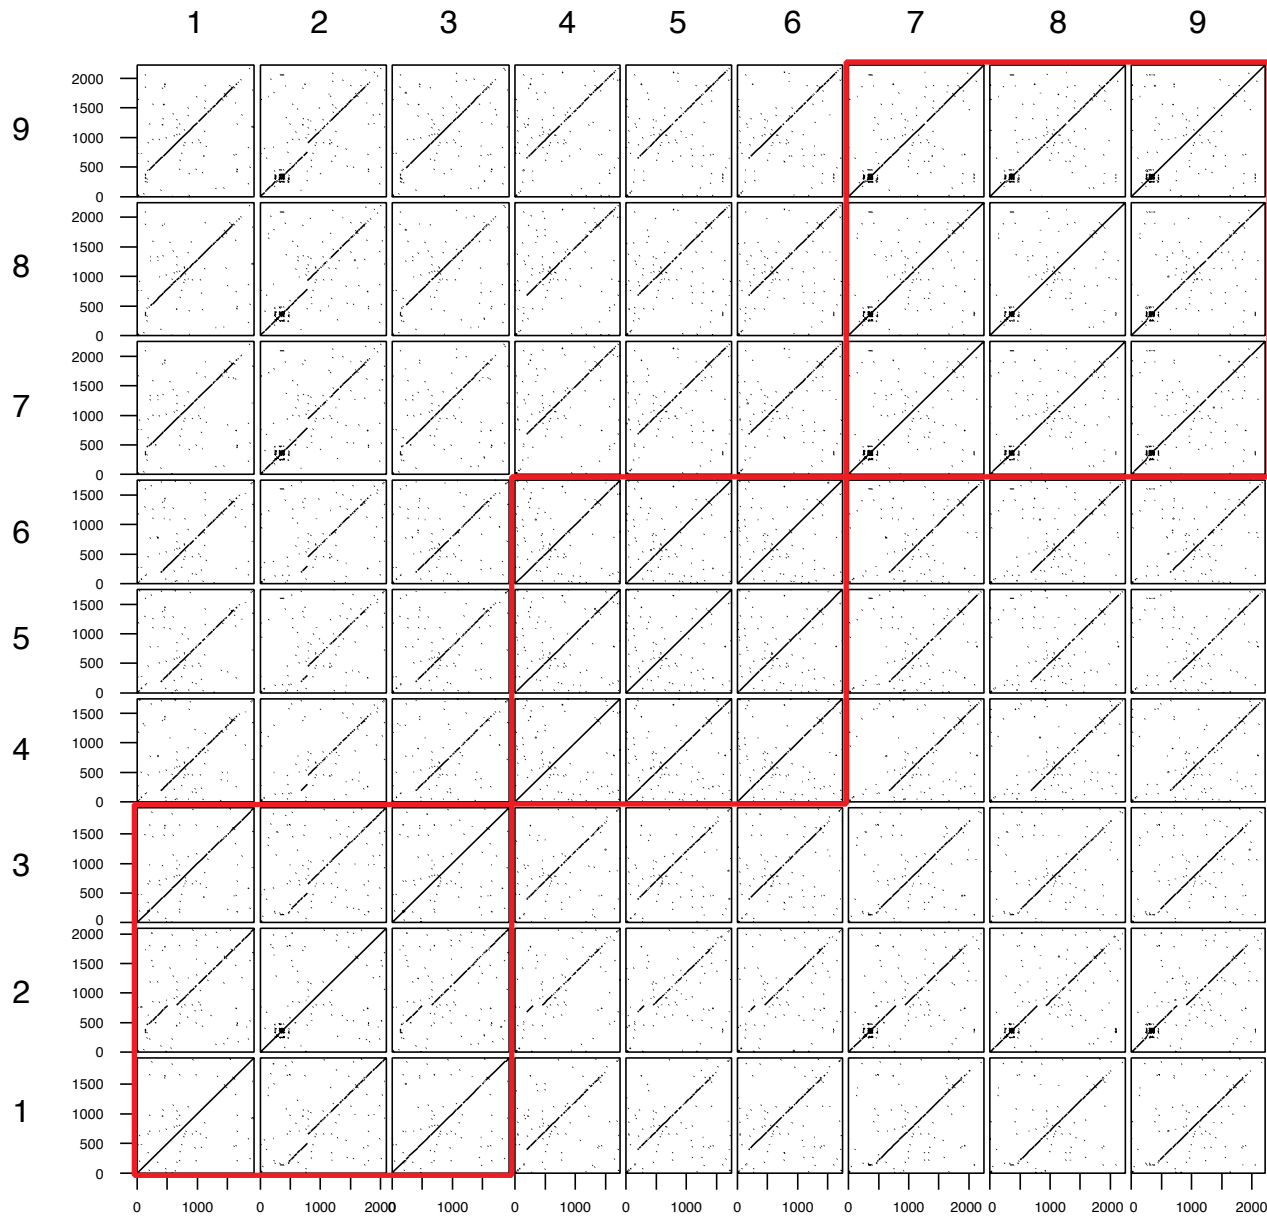

| No | Sequence          | Length |
|----|-------------------|--------|
| 1  | <i>Ng_APL1A_1</i> | 1945   |
| 2  | <i>Ng_APL1A_2</i> | 2093   |
| 3  | <i>Ng_APL1A_3</i> | 1946   |
| 4  | <i>Ng_APL1B_1</i> | 1746   |
| 5  | <i>Ng_APL1B_2</i> | 1749   |
| 6  | <i>Ng_APL1B_3</i> | 1749   |
| 7  | <i>Ng_APL1C_1</i> | 2252   |
| 8  | <i>Ng_APL1C_2</i> | 2252   |
| 9  | <i>Ng_APL1C_3</i> | 2222   |

**Figure S5B: Polydot plot of APL1 protein variants**

wordsize=4

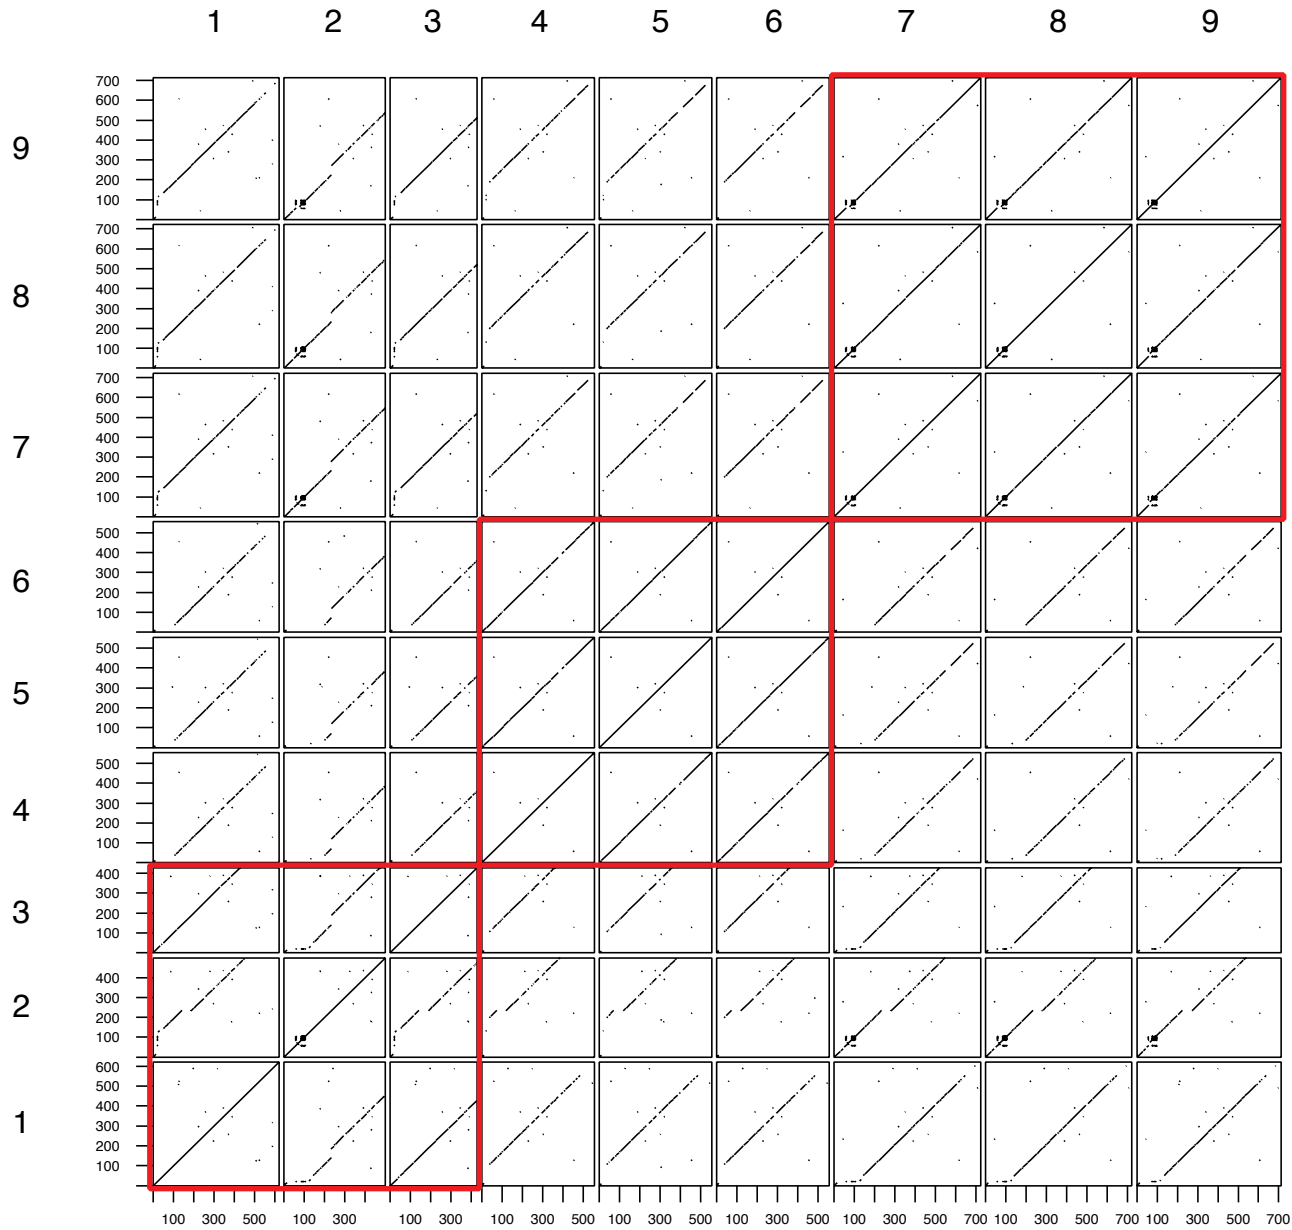

| No | Sequence   | Length |
|----|------------|--------|
| 1  | Ng_APL1A_1 | 621    |
| 2  | Ng_APL1A_2 | 499    |
| 3  | Ng_APL1A_3 | 428    |
| 4  | Ng_APL1B_1 | 554    |
| 5  | Ng_APL1B_2 | 555    |
| 6  | Ng_APL1B_3 | 555    |
| 7  | Ng_APL1C_1 | 722    |
| 8  | Ng_APL1C_2 | 722    |
| 9  | Ng_APL1C_3 | 712    |

**Figure S5C: Polydot plot of *APL1* genomic regions against the nucleotide sequence of the *APL1A* dsRNA regions**

wordsize=8

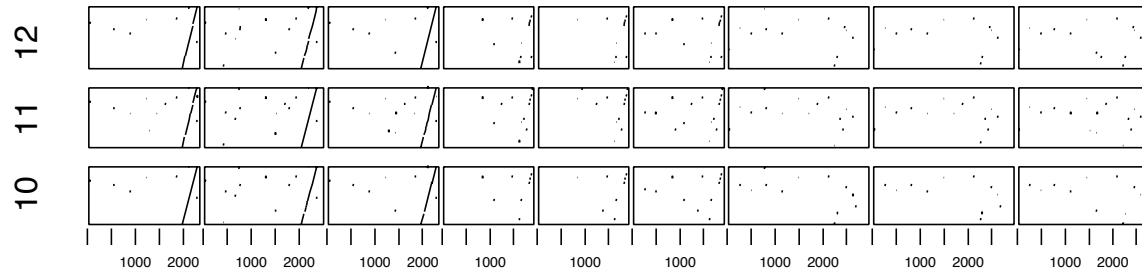

wordsize=20

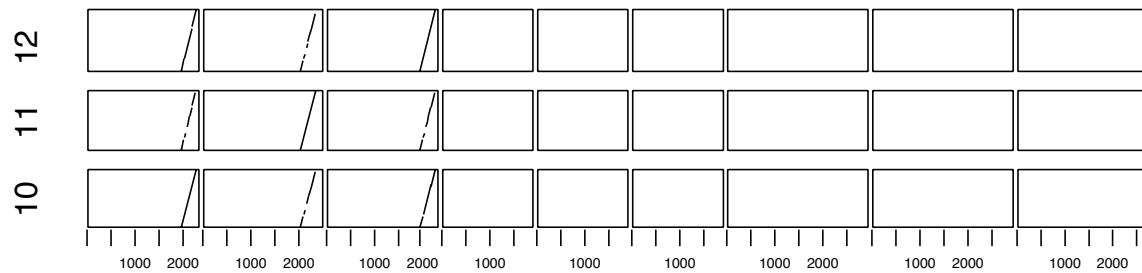

1 2 3 4 5 6 7 8 9

| No. | Length | Sequence            |
|-----|--------|---------------------|
| 1   | 2310   | <i>Ng_APL1A_1</i>   |
| 2   | 2478   | <i>Ng_APL1A_2</i>   |
| 3   | 2311   | <i>Ng_APL1A_3</i>   |
| 4   | 1878   | <i>Ng_APL1B_1</i>   |
| 5   | 1881   | <i>Ng_APL1B_2</i>   |
| 6   | 1881   | <i>Ng_APL1B_3</i>   |
| 7   | 2924   | <i>Ng_APL1C_1</i>   |
| 8   | 2916   | <i>Ng_APL1C_2</i>   |
| 9   | 2878   | <i>Ng_APL1C_3</i>   |
| 10  | 312    | <i>dsNg_APL1A_1</i> |
| 11  | 321    | <i>dsNg_APL1A_2</i> |
| 12  | 321    | <i>dsNg_APL1A_3</i> |
