# Supplementary material for: Diverged Alleles of the Anopheles gambiae Leucine-Rich Repeat Gene APL1A Display Distinct Protective Profiles against Plasmodium falciparum
Source: PubMed Central journal article supplement (PMC3532451; doi:10.1371/journal.pone.0052684), 2012-12-28
Supplement: pone.0052684.s006.pdf [file pone.0052684.s006.pdf]

**Table S1: Oligonucleotides used to amplify *APL1* genes and genomic regions from *A. gambiae* Ngousso.**

| <b>genomic region</b>                                   | <b>primer 1</b>               | <b>primer 2</b>               |
|---------------------------------------------------------|-------------------------------|-------------------------------|
| intergenic region: AGAP007037 - AGAP007036              | 5' CAAATCGCGCAAGATGATCAAGC 3' | 5' TATTAGTGATACGGCGCGTAACC 3' |
| <i>APL1A</i> <sup>1</sup> and <i>APL1A</i> <sup>3</sup> | 5' GATCTAAAGCCTAAGTCGACGTA 3' | 5' TCGATCACTGGCTCACATGGAT 3'  |
| <i>APL1A</i> <sup>2</sup>                               | 5' TAGCTGGATCCCAAGTAGTGCT 3'  | 5' CAGCGCTACGTAATTCATGG 3'    |
| intergenic region: AGAP007036 - AGAP007035              | 5' CTCGGCAATCACAGACCTAACT 3'  | 5' CACCTACGGTAGAACTTGCTCA 3'  |
| <i>APL1B</i>                                            | 5' TGAGCAAGTTCTACCGTAGGTG 3'  | 5' TTTGCCGAAGGAGAAGCATCTC 3'  |
| <i>APL1C</i>                                            | 5' CCTCGAAAATCACACCAGACTG 3'  | 5' GAGCATCCCGTTTTTCGATA 3'    |
