# Supplementary material for: Diverged Alleles of the Anopheles gambiae Leucine-Rich Repeat Gene APL1A Display Distinct Protective Profiles against Plasmodium falciparum
Source: PubMed Central journal article supplement (PMC3532451; doi:10.1371/journal.pone.0052684), 2012-12-28
Supplement: pone.0052684.s007.pdf [file pone.0052684.s007.pdf]

**Table S2: Parameters of the *P. falciparum* gametocyte (NF54) cultures and results of the different infection experiments**

**A) Silencing experiments**

|                                         | <b>Exp.1</b> | <b>Exp.2</b> | <b>Exp.3</b> |
|-----------------------------------------|--------------|--------------|--------------|
| <b>Gametocytaemia</b>                   | 1,4%         | 1,8%         | 2,0%         |
| <b>Percentage of mature gametocytes</b> | 83,50%       | 86,70%       | 94,10%       |

|                                 | <b>Exp.1_GFPkd</b> | <b>Exp.1_APL1Akd</b> | <b>Exp.2_GFPkd</b> | <b>Exp.2_APL1Akd</b> | <b>Exp.3_GFPkd</b> | <b>Exp.3_APL1Akd</b> |
|---------------------------------|--------------------|----------------------|--------------------|----------------------|--------------------|----------------------|
| <b>Mosquito number (n)</b>      | 40                 | 42                   | 48                 | 56                   | 111                | 119                  |
| <b>Infection Prevalence (%)</b> | 42                 | 74                   | 46                 | 70                   | 39                 | 60                   |
| <b>Median Oocyst load</b>       | 9                  | 4                    | 1                  | 1                    | 1                  | 1                    |
| <b>Mean Oocyst load</b>         | 9,2                | 10,1                 | 1,7                | 2,1                  | 1,7                | 2,8                  |

**B) Infection experiments without knock-down context**

|                                         | <b>Inf1</b> | <b>Inf2</b> | <b>Inf3</b> |
|-----------------------------------------|-------------|-------------|-------------|
| <b>Gametocytaemia</b>                   | 1,70%       | 1,30%       | 2%          |
| <b>Percentage of mature gametocytes</b> | 90,60%      | 96,30%      | 94,10%      |

|                                 | <b>Inf1</b> | <b>Inf2</b> | <b>Inf3</b> |
|---------------------------------|-------------|-------------|-------------|
| <b>Mosquito number (n)</b>      | 300         | 300         | 300         |
| <b>Infection Prevalence (%)</b> | 48          | 42          | 48          |
| <b>Median Oocyst load</b>       | 2           | 2           | 3           |
| <b>Mean Oocyst load</b>         | 3,8         | 3,2         | 5,9         |
